# Supplementary material for: Phosphorus removal and mechanisms by Zn-layered double hydroxide (Zn-LDHs)-modified zeolite substrates in a constructed rapid infiltration system
Source: Royal Society of Chemistry journal article supplement (doi:10.1039/c9ra04826j), 2019-01-01
Supplement: c9ra04826j1.pdf [file c9ra04826j1.pdf]

**Phosphorus removal enhancement and mechanisms by Zn-layered double hydroxides (Zn-LDHs) modified zeolites substrates in constructed rapid infiltration system**

Xiangling Zhang\*, Jingtian Gao, Yu Lei, Zhouying Xu, Shibin Xia\*, Yinghe Jiang, Jing Cheng

School of Civil Engineering and Architecture, Wuhan University of Technology,  
122, Luoshi Road, Hongshan District, Wuhan, China, 430070

Tel, +0086 013808670309

E-mail, [ZXLCL@126.com](mailto:ZXLCL@126.com)

It includes 11 pages, 7 Figures and 3 Tables

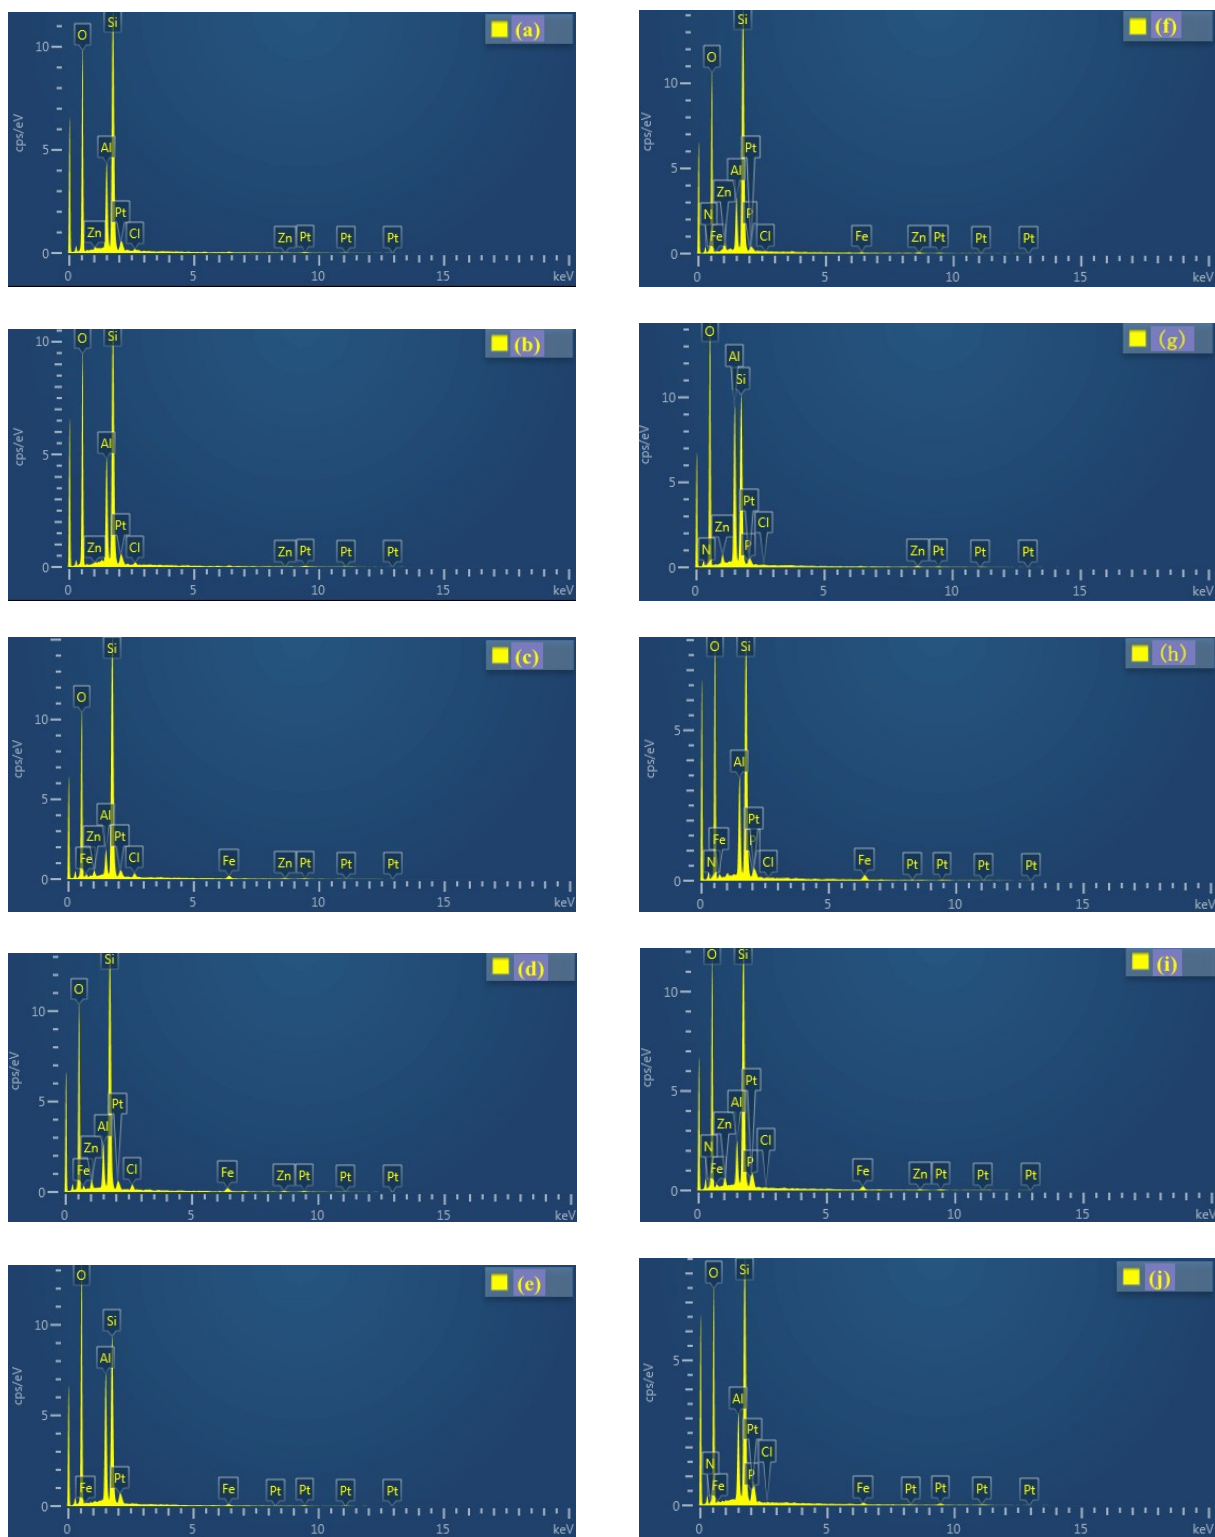

Figure S1. The EDX images of ZnAl-LDHs (2:1), ZnAl-LDHs (3:1), ZnFe-LDHs (2:1), ZnFe-LDHs (3:1) modified and original zeolites before (a, b, c, d, e) and after (f, g, h, i, j) purification experiments.

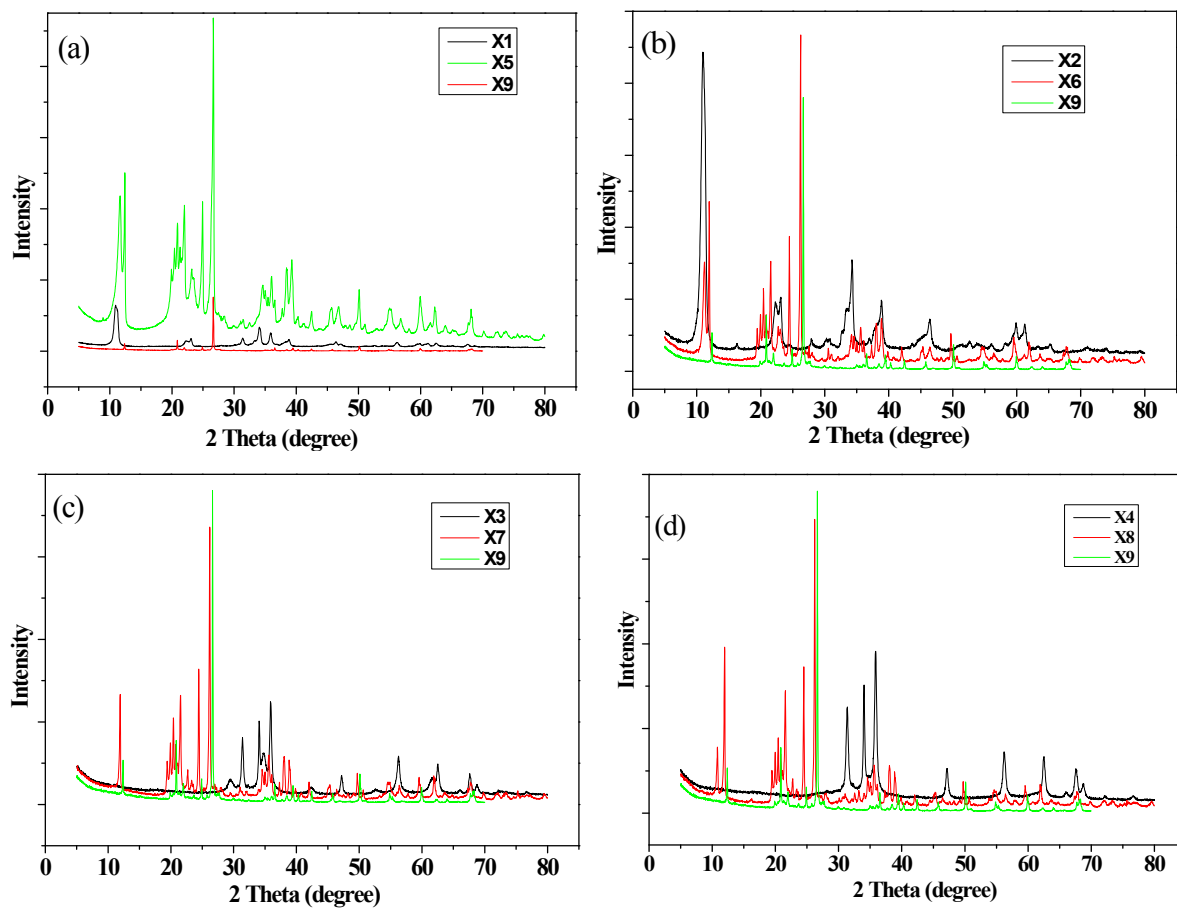

Figure S2. XRD patterns of ZnAl-LDHs-modified (2:1) (a), ZnAl-LDHs-modified (3:1) (b), ZnFe-LDHs-modified (2:1) (c) and ZnFe-LDHs-modified (3:1) (d) samples

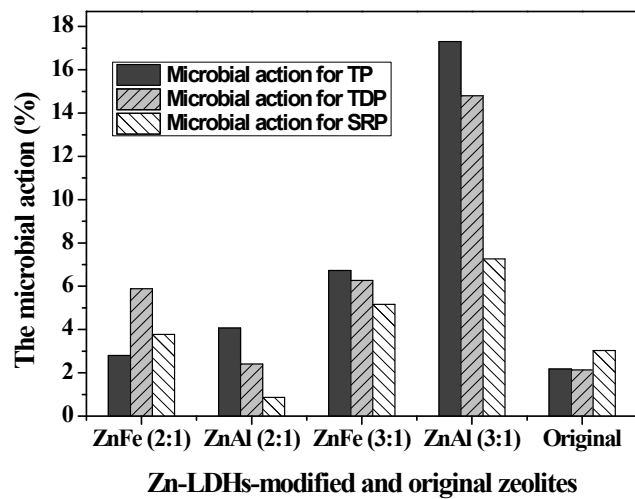

Figure S3. The microbial action for TP, TDP and SRP removal with Zn-LDHs-modified and original zeolites

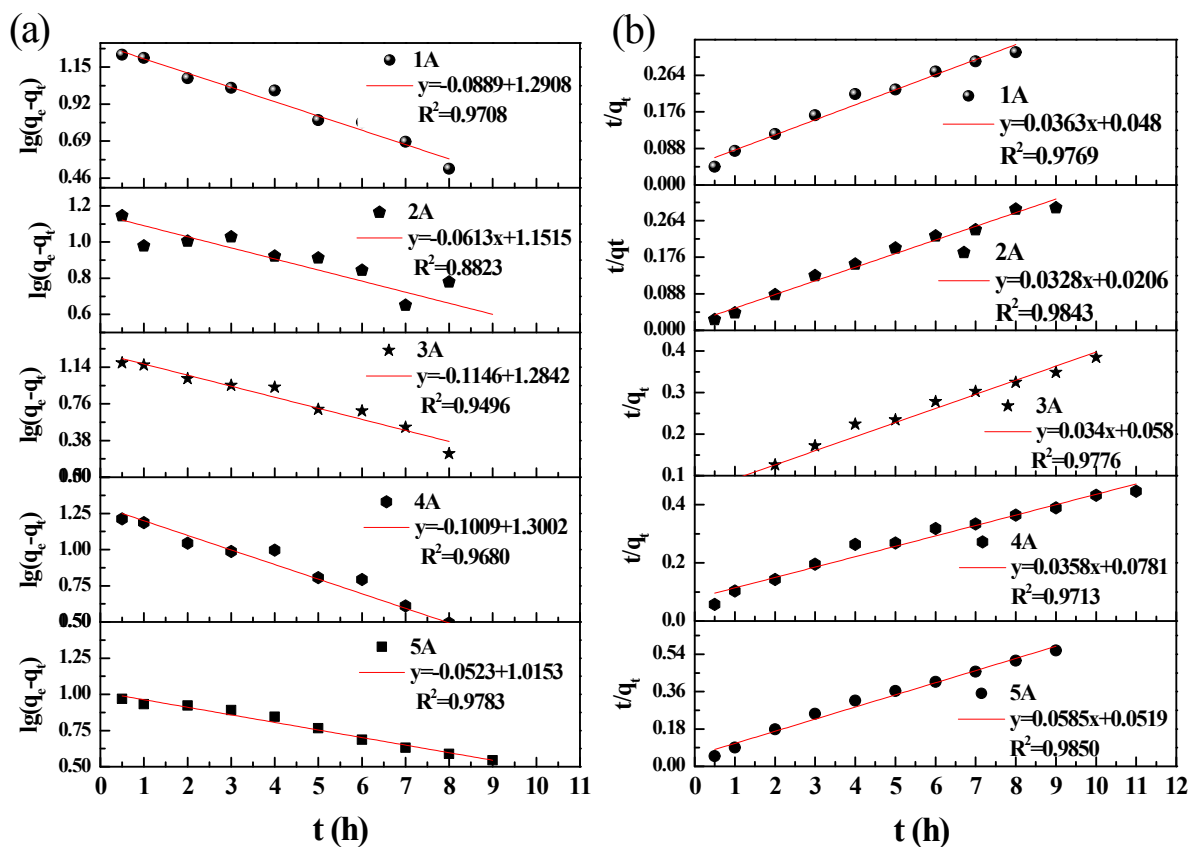

Figure S4. Pseudo-first-order (a) and pseudo-second-order (b) kinetic for adsorption of phosphate for Zn-LDHs-modified and original zeolites

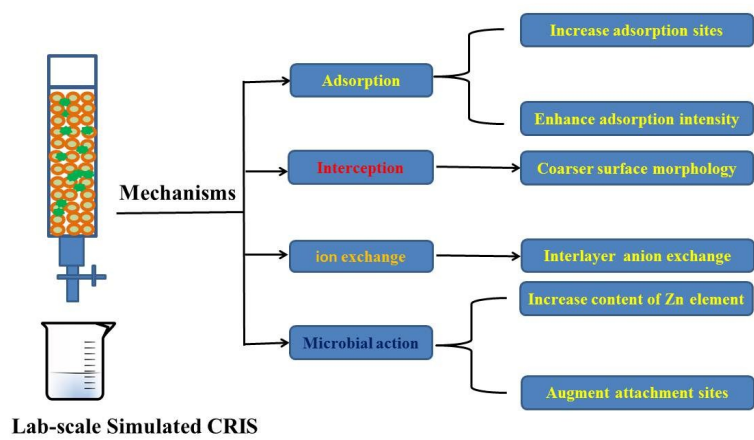

Figure S5. The main mechanisms for phosphorus removal in CRIS

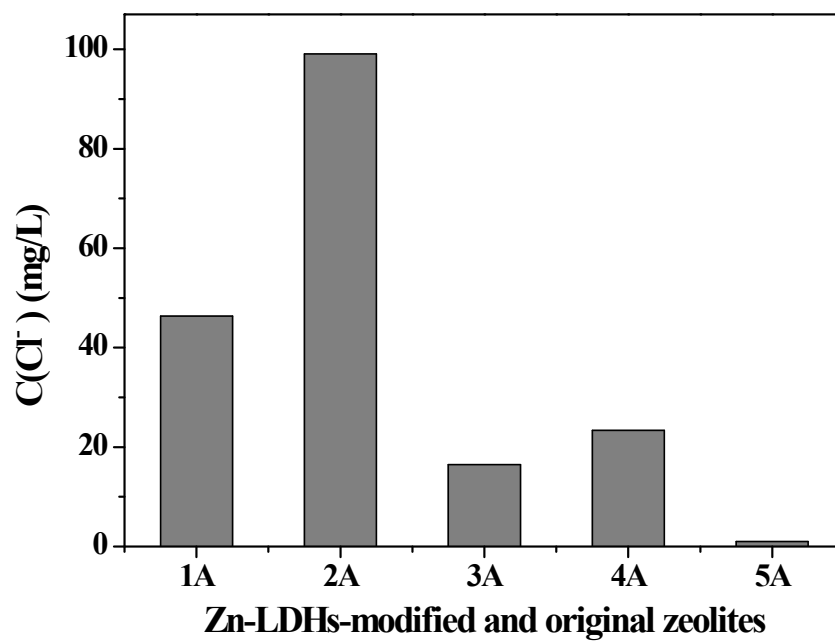

Figure S6. The  $\text{Cl}^-$  concentration in filtrates (mg/L)

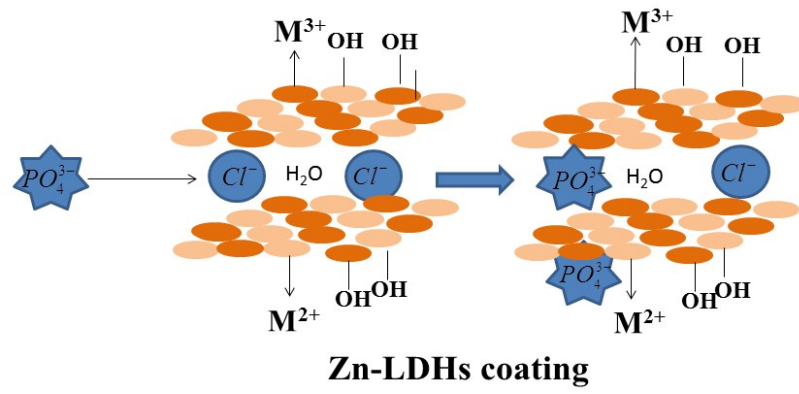

Figure S7. The adsorption and ion exchange mechanisms of Zn-LDHs coating



Table S1. The relative content of elements of all kinds of Zn-LDHs-modified and original zeolites before and after purification experiments

| Elements |     | Before purification experiments |       |       |       |       |
|----------|-----|---------------------------------|-------|-------|-------|-------|
|          |     | 1A                              | 2A    | 3A    | 4A    | 5A    |
| O        | Wt% | 61.05                           | 61.58 | 60.71 | 59.94 | 63.58 |
|          | At% | 73.22                           | 73.59 | 74.05 | 73.30 | 75.36 |
| Si       | Wt% | 29.50                           | 24.75 | 25.84 | 30.59 | 26.14 |
|          | At% | 20.15                           | 16.85 | 17.95 | 21.31 | 17.65 |
| Al       | Wt% | 9.04                            | 13.13 | 8.40  | 5.12  | 9.65  |
|          | At% | 6.43                            | 9.30  | 6.07  | 3.71  | 6.78  |
| Fe       | Wt% | -                               | -     | 3.28  | 2.21  | -     |
|          | At% | -                               | -     | 1.15  | 0.77  | -     |
| Zn       | Wt% | 0.11                            | 0.14  | 0.77  | 1.11  | -     |
|          | At% | 0.03                            | 0.04  | 0.23  | 0.33  | -     |
| P        | Wt% | -                               | -     | -     | -     | -     |
|          | At% | -                               | -     | -     | -     | -     |
| Cl       | Wt% | 0.30                            | 0.39  | 1.01  | 2.21  | -     |
|          | At% | 0.16                            | 0.21  | 0.56  | 0.58  | -     |
| Elements |     | After purification experiments  |       |       |       |       |
|          |     | 1A                              | 2A    | 3A    | 4A    | 5A    |
| O        | Wt% | 59.60                           | 59.46 | 61.40 | 63.06 | 63.27 |
|          | At% | 72.05                           | 72.17 | 73.13 | 74.87 | 75.06 |
| Si       | Wt% | 31.08                           | 23.06 | 24.31 | 27.44 | 32.39 |
|          | At% | 21.40                           | 15.95 | 16.49 | 18.56 | 21.89 |
| Al       | Wt% | 5.96                            | 12.48 | 9.54  | 4.60  | 4.34  |
|          | At% | 4.27                            | 8.98  | 6.73  | 3.24  | 3.05  |
| Fe       | Wt% | -                               | -     | 2.40  | 2.23  | -     |
|          | At% | -                               | -     | 0.82  | 0.76  | -     |
| Zn       | Wt% | 1.52                            | 3.58  | 0.46  | 0.90  | -     |
|          | At% | 0.45                            | 1.06  | 0.29  | 0.26  | -     |
| P        | Wt% | 0.08                            | 0.05  | 0.28  | 0.08  | 0.01  |
|          | At% | 0.05                            | 0.05  | 0.17  | 0.08  | 0.01  |
| Cl       | Wt% | 0.04                            | 0.14  | 0.21  | 0.10  | -     |
|          | At% | 0.02                            | 0.08  | 0.11  | 0.05  | -     |

Table S2. Intra-particle diffusion model constants and correlation coefficients for adsorption of phosphate on LDHs-modified and original zeolites

| Adsorbents | $C_0$<br>(mg/L) | Intra-particle diffusion model      |       |           |                                     |        |           |                                     |        |           |
|------------|-----------------|-------------------------------------|-------|-----------|-------------------------------------|--------|-----------|-------------------------------------|--------|-----------|
|            |                 | $K_{d1}$<br>(mg/h <sup>1/2</sup> g) | $C_1$ | $(R_1)^2$ | $K_{d2}$<br>(mg/h <sup>1/2</sup> g) | $C_2$  | $(R_2)^2$ | $K_{d3}$<br>(mg/h <sup>1/2</sup> g) | $C_3$  | $(R_3)^2$ |
| 1A         |                 | 6.9068                              | 0     | 1         | 6.9068                              | 5.8473 | 0.9707    | -34.458                             | 131.01 | 1         |
| 2A         |                 | 27.46                               | 0     | 1         | 4.3998                              | 16.140 | 0.924     | -32.709                             | 136.83 | 1         |
| 3A         | 4               | 15.652                              | 0     | 1         | 6.1059                              | 6.6904 | 0.9832    | -13.727                             | 74.35  | 1         |
| 4A         |                 | 12.357                              | 0     | 1         | 6.0798                              | 4.3921 | 0.9849    | -13.727                             | 72.602 | 1         |
| 5A         |                 | 14.554                              | 0     | 1         | 3.2492                              | 6.9957 | 0.9551    | -32.813                             | 137.92 | 1         |

Table S3. The corresponding sequences, OTUs, Chao 1 and Shannon indexes in lab-scale simulated CRIS

| Samples | Effective sequences | High-quality sequences | OTUs | Chao 1 | ACE     | Shannon | Simpson |
|---------|---------------------|------------------------|------|--------|---------|---------|---------|
| 1A      | 30327               | 26013                  | 788  | 545.0  | 676.16  | 5.97    | 0.935   |
| 2A      | 27446               | 24978                  | 949  | 662.0  | 662.00  | 7.07    | 0.978   |
| 3A      | 42471               | 39095                  | 961  | 662.0  | 924.73  | 6.78    | 0.973   |
| 4A      | 42069               | 39362                  | 1033 | 711.0  | 978.07  | 6.99    | 0.979   |
| 5A      | 41436               | 35472                  | 1407 | 1179.0 | 1427.65 | 7.62    | 0.969   |
| Total   | 183749              | 164920                 | -    | -      | -       | -       | -       |
